# Supplementary material for: Bacterial natural products in the fight against mosquito-transmitted tropical diseases
Source: Royal Society of Chemistry journal article supplement (doi:10.1039/c9np00042a), 2019-09-23
Supplement: c9np00042a1.xlsx [file c9np00042a1.xlsx]

## Sheet: Folha1
Name	PubChem CID	Source	IC50 P. falciparum / µM	Cytotoxicity	SI	Notes	References
2-undecen-1’-yl-4-quinolone		Pseudomonas sp. 1531 E7	11	17 µM, IC50 KB cells	2	CAS: 678176-79-9	42
2-undecyl-4- quinolone	10063343	Pseudomonas sp. 1531 E7	3	>33 µM, IC50 KB cells	>11		42
acrylamidine	3481477	Streptomyces eurythermits	167.49	853.56 µM, IC50 MRC-5 cells	5		43,44
actinoramide A	53483403	Streptomyces bangulaensis	0.19±0.02	>100 µM, IC50 HepG2 cells	>476		45
aerucyclamide B	24970831	Microcystis aeruginosa PCC 7806	0.7	120 µM, IC50 L6 cells	171	other aerucyclamides in the same paper	46
alborixin	73359	Streptomyces albus	0.0007	0.027 µM, EC50 U937 cells	39		47,48
ambigol A	475341	Fischerella ambigua	1.74	68 µM, MIC L6 cells	39		49
ambigol C	5276614	Fischerella ambigua	3.17	206 µM, MIC L6 cells	65		49
amidinomycin	160703	Streptomyces flavochromogenes	0.857	1.61 µM, IC50 MRC-5 cells	2		44,50
bacilosarcin A	101439757	Bacillus sp. GL0033	2.2	64.3% growth of MCF-7 cells at 20 µM	ND		51
bafilomycin A1	6436223	Streptomyces spectabilis	0.066±0.016	0.32±0.06, IC50 BC-1 cells	3-8		52
balgacyclamide A	86579110	Microcystis aeruguinosa EAWAG 251	9.0	>150 µM, IC50 L6 cells	>17		53
balgacyclamide B	86579111	Microcystis aeruguinosa EAWAG 251	8.2	>150 µM, IC50 L6 cells	>18		53
bastimolide A	122232645	Okeania hirsuta	0.140	2.1 µM, IC50 Vero cells	15		54
calothrixin A	9926867	Calothrix sp.	0.058±0.008	40±9 nM, IC50 HeLa cells	<1		55
calothrixin B	9817721	Calothrix sp.	0.180±0.044	350±82 nM, IC50 HeLa cells	1-3		55
carmabin A	16757536	Lyngbya majuscula	4.3	9.8 µM, IC50 Vero cells	2		56
concanamycin A	6438151	Streptomyces diastatochromogenes S-45	0.0002	0.00019 µM, IC50 HeLa cells	1		57–59
cyclamidomycin	5368895	Streptomyces sp. MA 130-A1	8.39	10.93 µM, IC50 MRC-5 cells	1		44,60
dibutyl phthalate	3026	Actinomycete sp. H11809	17.5±4.5	3244±11 µM, IC50 Chang liver cells	147-250		61
dragomabin	16737469	Lyngbya majuscula	6.0	182.3 µM, IC50 Vero cells	30		56
dragonamide A	11671902	Lyngbya majuscula	7.7	67.8 µM, IC50 Vero cells	9		56
echinomycin	3197	Streptomyces echinatus	0.00370±0.00001	4.4±1.0 µM, IC50 HMEC	916-1463		62,63
gallinamide A	25209862	Schizothrix sp.	8.2	10.4 µM, TC50 Vero cells	1		64
gramicidin D	16130140	Brevibacillus brevis	0.000019	0.015 µM, EC50 U937 cells	789		47,65
gramicidin S	73357	Brevibacillus brevis	1.3	7.5 µM, LC50 A549 cells	6		66
grisorixin	12780142	Streptomyces griseus	0.0012	0.035 µM, EC50 U937 cells	29		47,67
isopropylstilbene	6439522	Photorhabdus sp.	7.67		ND		68
lagunamide A	50901239	Lyngbya majuscula	0.19	6.4 nM, IC50 P388 cells	<1		69
lagunamide B	50901240	Lyngbya majuscula	0.91	20.5 nM, IC50 P388 cells	<1		69
lagunamide C		Lyngbya majuscula	0.29	24.4 nM, IC50 P388 cells	<1		70
lasalocid A	5360807	Streptomyces lasaliensis	0.047	30 mg/kg LD50 in mice (i.p.)	ND		71,72
lonomycin A	10101992	Streptomyces ribosidifcus TM-481	0.0017	0.283 µM, EC50 U937 cells	166		47,73
lysocellin	3036964	Streptomyces cacaoi	0.012	0.111 µM, EC50 U937 cells	9		47,74
maduramicin	196129	Actinomadura yumaensis	0.0013±0.0001	75 nM, IC50 C2C12 cells	58		75,76
malyngolide dimer	46211780	Lyngbya majuscula	19	55 µM, 10% survival H-460 cells	ND		77
manzamine A	6509753	Micromonospora sp. M42	0.015	2.2 µM, IC50 Vero cells	147		78,79
marinoquinoline B	54583213	Ohtaekwangia kribbensis	1.8	30.6 µM, IC50 L6 cells	17	other marinoquinolines in the same paper	80
metacycloprodigiosin	44521126	Streptomyces spectabilis	0.012±0.002	0.63±0.02 µM, IC50 BC-1 cells	44-65		52
mevalagmapeptide A	73332828	Photorhabdus luminescens	38.4	>150 µM, IC50 Rat L6 cells	>4		81
micrococcin	6446886	Micrococcus varians, Bacillus pumilus, Staphylococcus equorum	0.035	>30 µM, IC50 HepG2 cells	>857		82–84
monensin A	441145	Streptomyces cinnamonensis	0.0022	0.095 µM, EC50 U937 cells	43		47,85
narasin A	65452	Streptomyces aureofacies	0.0013	0.399 µM, EC50 U937 cells	307		47,86
neothramycin	122745	Streoptomyces sp. MC916-C4	4.16	1.49 µM, IC50 MRC-5 cells	<1		44,87
nigericin	34230	Streptomyces hygroscopicus var. Geldanus	0.0014	0.266 µM, EC50 U937 cells	190		47,88
nonactin	72519	Streptomyces griseus ETH A7796	0.433–0.597	3.53 µM, CC50 Huh7 cells	6-8		47,89,90
nostocarboline	5326150	Nostoc sp. 78-12A	0.194	120.9 µM, IC50 L6 cells	623		91
pactamycin	5289124	Streptomyces pactum	0.014	0.095 µM, IC50 MRC-5 cells	7		44,92
romidepsin	5352062	Chromobacterium spp.	0.09±0.03	0.001±0.001 µM, IC50 NFF cells	<1		93,94
salinipostin A	122222702	Salinospora sp.	0.05	>50 µM, EC50 HFF cells	>1000		95
salinomycin	3085092	Streptomyces spp.	0.0219±0.0123	157.5±45.0 nM, IC50 HMEC-1 cells	3-21	gametocyte activity reported in the nM range	96
salinosporamide A	11347535	Salinispora tropica	0.0114±0.0019	0.082 µM, IC50 RPMI 8226 cells	6-9		97,98
symplocamide A	44448139	Symploca sp.	0.95	40 nM, IC50 H460 cells	<1		99
szentiamide		Xenorhabdus szentirmaii DSM 16338T	1.19	68.5 µM, IC50 L6 cells	58	ChemSpider ID: 27444379	100
taxlllaid A	122205185	Xenorhabdus indica	7.19	14 µM, IC50 L6 cells	2		101
thiostrepton	16129666	Streptomycetes sp.	1.8	27.8±10.9 µM, IC50 HeLa cells	9-22		102,103
trioxacarcin A	3067465	Streptomyces sp. B8652	0.0017±0.0001	1.8±0.1 nM, IC50 K1 cells	1		104
trioxacarcin B	3086133	Streptomyces sp. B8652	0.091±0.007	114±5 nM, IC50 K1 cells	1		104
trioxacarcin D	49799759	Streptomyces sp. B8652	0.0020±0.0001	2.8±0.2 nM, IC50 K1 cells	1-2		104
tumonoic acid I	25058102	Blennothrix cantharidosmum	2		ND		105
tychonamide A	101846893	Tychonema sp.	0.998	2.79 µM, IC50 L6 cells	3		106
tychonamide B	101846894	Tychonema sp.	1.25	3.34 µM, IC50 L6 cells	3		106
tyrocidine A	6129635	Brevibacillus brevis	0.00058	14 µM, LC50 A549 cells	24138	other tyrocidines in the same paper	66
valinomycin	5649	Streptomyces fulvissimus	0.0048	0.0022 µM, EC50 U937 cells	<1		47,107
venturamide A	11225555	Oscillatoria sp.	8.2	86 µM, IC50 Vero cells	10		108
venturamide B	16115401	Oscillatoria sp.	5.2	56 µM, IC50 Vero cells	11		108
viridamide A	25111596	Oscillatoria nigro-Wiridis OSC3L	5.8±0.6		ND		109
xenoamicin A		Xenorhabdus mauleonii DSM17908	1.81	52.7 µM, IC50 L6 cells	29		110
xenobactin		Xenorhabdus sp. PB30.3	16.45	No toxicity Rat L6 cells	ND		111
xenorhabdin-2	185189	Xenorhabdus doucetiae	4.36	0.197 µM, IC50 Rat L6 cells	<1		81
xenorhabdin-5	185192	Xenorhabdus doucetiae	1.84	0.107 µM, IC50 Rat L6 cells	<1		81
